# Supplementary material for: Sub-Saharan Africa needs better agronomy to meet maize demand without massive cropland expansion and imports
Source: Research Square preprint supplement (doi:10.21203/rs.3.rs-3195113/v1), 2023-09-15
Supplement: Supplementary file 1 [file 57c8c74b53e1e604602fd03f.pdf]

## Reporting Summary

Nature Portfolio wishes to improve the reproducibility of the work that we publish. This form provides structure for consistency and transparency in reporting. For further information on Nature Portfolio policies, see our [Editorial Policies](#) and the [Editorial Policy Checklist](#).

### Statistics

For all statistical analyses, confirm that the following items are present in the figure legend, table legend, main text, or Methods section.

n/a Confirmed

- ☐ ☒ The exact sample size ( $n$ ) for each experimental group/condition, given as a discrete number and unit of measurement
- ☐ ☒ A statement on whether measurements were taken from distinct samples or whether the same sample was measured repeatedly
- ☐ ☒ The statistical test(s) used AND whether they are one- or two-sided  
*Only common tests should be described solely by name; describe more complex techniques in the Methods section.*
- ☐ ☒ A description of all covariates tested
- ☐ ☒ A description of any assumptions or corrections, such as tests of normality and adjustment for multiple comparisons
- ☐ ☒ A full description of the statistical parameters including central tendency (e.g. means) or other basic estimates (e.g. regression coefficient) AND variation (e.g. standard deviation) or associated estimates of uncertainty (e.g. confidence intervals)
- ☐ ☒ For null hypothesis testing, the test statistic (e.g.  $F$ ,  $t$ ,  $r$ ) with confidence intervals, effect sizes, degrees of freedom and  $P$  value noted  
*Give  $P$  values as exact values whenever suitable.*
- ☒ ☐ For Bayesian analysis, information on the choice of priors and Markov chain Monte Carlo settings
- ☒ ☐ For hierarchical and complex designs, identification of the appropriate level for tests and full reporting of outcomes
- ☐ ☒ Estimates of effect sizes (e.g. Cohen's  $d$ , Pearson's  $r$ ), indicating how they were calculated

*Our web collection on [statistics for biologists](#) contains articles on many of the points above.*

### Software and code

Policy information about [availability of computer code](#)

Data collection

Data on yield potential were downloaded from the Global Yield Gap Atlas. Data on national average maize yield, harvested area, production, export, and import, and demand were downloaded from FAOSTAT. Data on maize distribution in Africa were downloaded from SPAM through Harvard Dataverse. Data on population size were downloaded from the UN population portal. Data on per-capita future maize demand was downloaded from IFPRI IMPACT Model. Data on climate were downloaded from WorldClim and CHIRPS. Data on soil properties were downloaded from ISRIC. Data on topography were downloaded from Amazon Web Services - Terrain Tiles.

Data analysis

All data analysis was conducted in R (version 4.2.1) with the following packages and versions: raster (3.5.29), sirad (2.3.3), terra (1.6.17), data.table (1.14.2), lubridate (1.8.0), readxl (1.4.0), stringi (1.7.8), stringr (1.4.0), stringdist (0.9.8), car (3.1.0), cartography (3.0.1), partykit (1.2.16), ltm (1.2.0), emmeans (1.8.5), lme4 (1.1.30)

For manuscripts utilizing custom algorithms or software that are central to the research but not yet described in published literature, software must be made available to editors and reviewers. We strongly encourage code deposition in a community repository (e.g. GitHub). See the Nature Portfolio [guidelines for submitting code & software](#) for further information.

## Data

Policy information about [availability of data](#)

All manuscripts must include a [data availability statement](#). This statement should provide the following information, where applicable:

- Accession codes, unique identifiers, or web links for publicly available datasets
- A description of any restrictions on data availability
- For clinical datasets or third party data, please ensure that the statement adheres to our [policy](#)

Data on yield potential from Global Yield Gap Atlas are available at [www.yieldgap.org](http://www.yieldgap.org). Data on national average maize yield, harvested area, production, export, and import, and demand from FAOSTAT are available at [www.fao.org/faostat](http://www.fao.org/faostat). Data on maize distribution from SPAM map are available in Harvard Dataverse. Data on population size from UN are available at <https://population.un.org/wpp/>. Data on per-capita future maize demand is available at <https://www.ifpri.org/project/ifpri-impact-model>. The source data are provided with this paper.

## Research involving human participants, their data, or biological material

Policy information about studies with [human participants or human data](#). See also policy information about [sex, gender \(identity/presentation\), and sexual orientation](#) and [race, ethnicity and racism](#).

|                                                                    |                                                                                                                                                                                                                                                                                                                                                                                                                                             |
|--------------------------------------------------------------------|---------------------------------------------------------------------------------------------------------------------------------------------------------------------------------------------------------------------------------------------------------------------------------------------------------------------------------------------------------------------------------------------------------------------------------------------|
| Reporting on sex and gender                                        | No sex or gender data was recorded.                                                                                                                                                                                                                                                                                                                                                                                                         |
| Reporting on race, ethnicity, or other socially relevant groupings | No socially constructed or socially relevant categorization variable was used in our manuscript.                                                                                                                                                                                                                                                                                                                                            |
| Population characteristics                                         | No population characteristics of the human research participants were collected or used.                                                                                                                                                                                                                                                                                                                                                    |
| Recruitment                                                        | Maize fields were selected based on farmers affiliation to the One Acre Fund program or for being neighbors of a field cropped under such program. Maize fields under the One Acre Fund program are expected to have greater technology adoption. We see inclusion of fields with varying level of technology adoption in the database as an advantage as it allows to increase the variation in management practices across farmer fields. |
| Ethics oversight                                                   | The study protocol was approved by the University of Nebraska-Lincoln and One Acre Fund.                                                                                                                                                                                                                                                                                                                                                    |

Note that full information on the approval of the study protocol must also be provided in the manuscript.

## Field-specific reporting

Please select the one below that is the best fit for your research. If you are not sure, read the appropriate sections before making your selection.

- ☐ Life sciences ☐ Behavioural & social sciences ☒ Ecological, evolutionary & environmental sciences

For a reference copy of the document with all sections, see [nature.com/documents/nr-reporting-summary-flat.pdf](https://nature.com/documents/nr-reporting-summary-flat.pdf)

## Ecological, evolutionary & environmental sciences study design

All studies must disclose on these points even when the disclosure is negative.

|                          |                                                                                                                                                                                                                                                                                                                                                                                                                                                                                  |
|--------------------------|----------------------------------------------------------------------------------------------------------------------------------------------------------------------------------------------------------------------------------------------------------------------------------------------------------------------------------------------------------------------------------------------------------------------------------------------------------------------------------|
| Study description        | We measured maize yields and final plant stands and collected data on agronomic practices via surveys to smallholder farmers to identify agronomic practices that impact maize productivity most. Observations were stratified through climate zones. We included 26 management practice variables and 6 environmental covariables in the analysis. The effect of these variables on maize yields was analyzed with conditional inference trees and linear mixed-effects models. |
| Research sample          | The research sample includes 13,364 maize fields (Zea mays) from smallholder farmers in East Africa. The sample was chosen to include fields with varying levels of technology adoption. The sample represents the various technologies smallholders used in maize fields in East Africa.                                                                                                                                                                                        |
| Sampling strategy        | Data was collected from maize fields following the One Acre Fund program (whose farmers were willing to complete the survey) and from neighboring fields that did not follow the program. The sample size from neighboring fields was chosen to match the fields following the program. Data was stratified via climate zones. Only data from climate zones with more than 200 observations were used to ensure a sufficient sample size.                                        |
| Data collection          | In each field, One Acre Fund Monitoring and Evaluation (OAF MEL) team members measured maize grain yield, plant density, and row spacing in two randomly placed boxes of 36 m <sup>2</sup> at harvest, avoiding field edges. Data on agronomic management practices were collected through farmers surveys. The questions were provided to OAF MEL team members on a digital device. OAF MEL team asked them orally and recorded the answers from farmers in this device.        |
| Timing and spatial scale | Data was collected every year between 2016 and 2020 from four countries in East Africa: Burundi, Kenya, Rwanda, and Tanzania.                                                                                                                                                                                                                                                                                                                                                    |
| Data exclusions          | We excluded observations identified as yield outliers, as detected with a Bonferroni Outlier Test. Observations with plant densities or                                                                                                                                                                                                                                                                                                                                          |

fertilizer rates higher than four standard deviations from the mean and those from atypical sowing dates were also excluded. The final dataset only included observations with at least geolocation, yield, and fertilizer data and for those climate zones with more than 200 observations. All exclusion criteria were established before performing any statistical analysis on the effect of agronomic practices on maize yields.

Reproducibility

No experiments were conducted in this research. The survey data is available upon request

Randomization

Not applicable as we did not conduct field experiments.

Blinding

Not applicable.

Did the study involve field work? ☒ Yes ☐ No

## Field work, collection and transport

Field conditions

Measurements were conducted at harvest on farmers fields, at the end of the rainy season. All maize fields were rainfed (not irrigated).

Location

Samples were collected from 13,364 maize fields in East Africa in three regions: Kenya: Longitude 34.02 to 35.62, Latitude -1.13 to 1.22. Rwanda-Burundi: Longitude 28.94 to 30.83, Latitude -3.77 to -1.23. Tanzania: Longitude 32.74 to 36.07, Latitude -9.41 to -7.5.

Access & import/export

Not applicable

Disturbance

Not applicable

## Reporting for specific materials, systems and methods

We require information from authors about some types of materials, experimental systems and methods used in many studies. Here, indicate whether each material, system or method listed is relevant to your study. If you are not sure if a list item applies to your research, read the appropriate section before selecting a response.

### Materials & experimental systems

| n/a                                 | Involved in the study                                  |
|-------------------------------------|--------------------------------------------------------|
| <input checked="" type="checkbox"/> | <input type="checkbox"/> Antibodies                    |
| <input checked="" type="checkbox"/> | <input type="checkbox"/> Eukaryotic cell lines         |
| <input checked="" type="checkbox"/> | <input type="checkbox"/> Palaeontology and archaeology |
| <input checked="" type="checkbox"/> | <input type="checkbox"/> Animals and other organisms   |
| <input checked="" type="checkbox"/> | <input type="checkbox"/> Clinical data                 |
| <input checked="" type="checkbox"/> | <input type="checkbox"/> Dual use research of concern  |
| <input type="checkbox"/>            | <input checked="" type="checkbox"/> Plants             |

### Methods

| n/a                                 | Involved in the study                           |
|-------------------------------------|-------------------------------------------------|
| <input checked="" type="checkbox"/> | <input type="checkbox"/> ChIP-seq               |
| <input checked="" type="checkbox"/> | <input type="checkbox"/> Flow cytometry         |
| <input checked="" type="checkbox"/> | <input type="checkbox"/> MRI-based neuroimaging |
